# Supplementary material
Source: PubMed Central journal article supplement (PMC2693397)
Supplement: NIHMS103364-supplement-7_si_007.pdf [file NIHMS103364-supplement-7_si_007.pdf]

**Table 1S. Ubiquitin Fragment Ion Sequence Assignments.**

Fragment TITLEVEPSDTIENVK measured as 894.80 (2+)

| Measured m/z | Theoretical m/z | Ion name |
|--------------|-----------------|----------|
| 360.30       | 360.22          | y-3      |
| 429.26       | 429.27          | b-4      |
| 489.33       | 489.27          | y-4      |
| 558.36       | 558.31          | b-5      |
| 602.55       | 602.35          | y-5      |
| 657.34       | 657.38          | b-6      |
| 703.48       | 703.40          | y-6      |
| 786.43       | 786.42          | b-7      |
| 818.44       | 818.43          | y-7      |
| 970.50       | 970.51          | b-9      |
| 1002.52      | 1002.51         | y-9      |
| 1131.55      | 1131.55         | y-10     |
| 1230.62      | 1230.62         | y-11     |
| 1299.57      | 1299.67         | b-12     |
| 1359.67      | 1359.66         | y-12     |
| 1428.55      | 1428.71         | b-13     |
| 1472.79      | 1472.75         | y-13     |
| 1542.68      | 1542.75         | b-14     |
| 1573.67      | 1573.80         | y-14     |
| 1641.78      | 1641.82         | b-15     |

| $\Delta m$ between y-n and yn-1 | Fragment Ion | Measured m/z | Sequence | Measured m/z | Fragment Ion | $\Delta m$ between b-n and bn-1 |
|---------------------------------|--------------|--------------|----------|--------------|--------------|---------------------------------|
|                                 |              |              | Thr      |              |              |                                 |
|                                 |              |              | Ile      |              |              |                                 |
| 100.88                          | y-14         | 1573.67      | Thr      |              |              |                                 |
| 113.12                          | y-13         | 1472.79      | Leu      | 429.26       | b-4          |                                 |
| 129.05                          | y-12         | 1359.67      | Glu      | 558.36       | b-5          | 129.10                          |
| 99.05                           | y-11         | 1230.62      | Val      | 657.34       | b-6          | 98.98                           |
| 129.07                          | y-10         | 1131.55      | Glu      | 786.43       | b-7          | 129.09                          |
| 184.08 (97+87)                  | y-9          | 1002.52      | Pro      |              |              |                                 |
|                                 |              |              | Ser      | 970.50       | b-9          | 184.07 (97+87)                  |
| 114.96                          | y-7          | 818.44       | Asp      |              |              |                                 |
| 100.93                          | y-6          | 703.48       | Thr      |              |              |                                 |
| 113.22                          | y-5          | 602.55       | Ile      | 1299.57      | b-12         |                                 |
| 129.03                          | y-4          | 489.33       | Glu      | 1428.55      | b-13         | 128.98                          |
|                                 | y-3          | 360.30       | Asn      | 1542.68      | b-14         | 114.13                          |
|                                 |              |              | Val      | 1641.78      | b-15         | 99.10                           |
|                                 |              |              | Lys      |              |              |                                 |
