# Supplementary material
Source: PubMed Central journal article supplement (PMC2693397)
Supplement: NIHMS103364-supplement-8_si_008.pdf [file NIHMS103364-supplement-8_si_008.pdf]

**Table 2S. Unique SUMO 2 peptide TENNDHINLK fragment ion sequence assignments**

Fragment TENNDHINLK measured as 599.58 (2+)

| Measured m/z                   | Theoretical m/z | Ion name |
|--------------------------------|-----------------|----------|
| 231.10                         | 231.10          | b-2      |
| 260.18                         | 260.20          | y-2      |
| 374.27                         | 374.24          | y-3      |
| 487.40                         | 487.32          | y-4      |
| 574.37                         | 574.21          | b-5      |
| 624.44                         | 624.38          | y-5      |
| 711.31                         | 711.27          | b-6      |
| 739.43                         | 739.41          | y-6      |
| 824.37                         | 824.35          | b-7      |
| 853.46                         | 853.45          | y-7      |
| 938.41                         | 938.40          | b-8      |
| 967.51 (484.47 <sup>2+</sup> ) | 967.50          | y-8      |
| 1051.51                        | 1051.48         | b-9      |

| $\Delta m$ between y-n and yn-1 | Fragment Ion | Measured m/z | Sequence | Measured m/z | Fragment Ion | $\Delta m$ between b-n and bn-1 |
|---------------------------------|--------------|--------------|----------|--------------|--------------|---------------------------------|
|                                 |              |              | Thr      |              |              |                                 |
|                                 |              |              | Glu      | 231.10       | b-2          |                                 |
| 114.05                          | y-8          | 967.51       | Asn      |              |              |                                 |
| 114.03                          | y-7          | 853.46       | Asn      |              |              |                                 |
| 114.99                          | y-6          | 739.43       | Asp      | 574.37       | b-5          |                                 |
| 137.04                          | y-5          | 624.44       | His      | 711.31       | b-6          | 136.94                          |
| 113.13                          | y-4          | 487.40       | Ile      | 824.37       | b-7          | 113.06                          |
| 114.09                          | y-3          | 374.27       | Asn      | 938.41       | b-8          | 114.04                          |
|                                 | y-2          | 260.18       | Leu      | 1051.51      | b-9          | 113.10                          |
|                                 |              |              | Lys      |              |              |                                 |
