# Supplementary material
Source: PubMed Central journal article supplement (PMC2693397)
Supplement: NIHMS103364-supplement-9_si_009.pdf [file NIHMS103364-supplement-9_si_009.pdf]

**Table 3S. Recombinant SUMO 1 fragment ion sequence assignments.**Fragment **VIGQDSSEIHF**K measured as 680.63 (2+)

| Measured m/z | Theoretical m/z | Ion name              |
|--------------|-----------------|-----------------------|
| 213.13       | 213.16          | <b>b<sub>2</sub></b>  |
| 270.16       | 270.18          | <b>b<sub>3</sub></b>  |
| 294.20       | 294.18          | <b>y<sub>2</sub></b>  |
| 398.21       | 398.24          | <b>b<sub>4</sub></b>  |
| 431.26       | 431.24          | <b>y<sub>3</sub></b>  |
| 513.26       | 513.27          | <b>b<sub>5</sub></b>  |
| 544.36       | 544.32          | <b>y<sub>4</sub></b>  |
| 600.33       | 600.30          | <b>b<sub>6</sub></b>  |
| 760.44       | 760.40          | <b>y<sub>6</sub></b>  |
| 816.36       | 816.37          | <b>b<sub>8</sub></b>  |
| 847.43       | 847.43          | <b>y<sub>7</sub></b>  |
| 929.38       | 929.46          | <b>b<sub>9</sub></b>  |
| 962.46       | 962.46          | <b>y<sub>8</sub></b>  |
| 1066.52      | 1066.52         | <b>b<sub>10</sub></b> |
| 1090.50      | 1090.52         | <b>y<sub>9</sub></b>  |
| 1147.54      | 1147.54         | <b>y<sub>10</sub></b> |
| 1213.53      | 1213.58         | <b>b<sub>11</sub></b> |
| 1260.57      | 1260.62         | <b>y<sub>11</sub></b> |

| $\Delta m$ between y-n and yn-1 | Fragment Ion | Measured m/z          | Sequence | Measured m/z | Fragment Ion          | $\Delta m$ between b-n and bn-1 |
|---------------------------------|--------------|-----------------------|----------|--------------|-----------------------|---------------------------------|
|                                 |              |                       | Val      |              |                       |                                 |
| 113.03                          | 1260.57      | <b>y<sub>11</sub></b> | Ile      | 213.13       | <b>b<sub>2</sub></b>  |                                 |
| 57.04                           | 1147.54      | <b>y<sub>10</sub></b> | Gly      | 270.16       | <b>b<sub>3</sub></b>  | 57.03                           |
| 128.04                          | 1090.50      | <b>y<sub>9</sub></b>  | Gln      | 398.21       | <b>b<sub>4</sub></b>  | 128.05                          |
| 115.03                          | 962.46       | <b>y<sub>8</sub></b>  | Asp      | 513.26       | <b>b<sub>5</sub></b>  | 115.05                          |
| 86.99                           | 847.43       | <b>y<sub>7</sub></b>  | Ser      | 600.33       | <b>b<sub>6</sub></b>  | 87.07                           |
| 216.08 (87+129)                 | 760.44       | <b>y<sub>6</sub></b>  | Ser      |              |                       |                                 |
|                                 |              |                       | Glu      | 816.36       | <b>b<sub>8</sub></b>  | 216.03 (129+87)                 |
| 113.10                          | 544.36       | <b>y<sub>4</sub></b>  | Ile      | 929.38       | <b>b<sub>9</sub></b>  | 113.02                          |
| 137.06                          | 431.26       | <b>y<sub>3</sub></b>  | His      | 1066.52      | <b>b<sub>10</sub></b> | 137.14                          |
|                                 | 294.20       | <b>y<sub>2</sub></b>  | Phe      | 1213.53      | <b>b<sub>11</sub></b> | 146.99                          |
|                                 |              |                       | Lys      |              |                       |                                 |
